1 **Diet-Induced Vitamin D Deficiency Results in Reduced Skeletal Muscle**  
2 **Mitochondrial Respiration in C57BL/6J Mice**

3

4 Stephen P. Ashcroft<sup>1,3</sup>, Gareth Fletcher<sup>3</sup>, Ashleigh M. Philp<sup>3</sup>, Philip J. Atherton<sup>2</sup>,  
5 Andrew Philp<sup>3,4</sup>

6

7 <sup>1</sup>School of Sport, Exercise and Rehabilitation Sciences, University of Birmingham,  
8 Birmingham, UK.

9 <sup>2</sup>MRC-ARUK Centre for Musculoskeletal Ageing Research, Clinical, Metabolic and  
10 Molecular Physiology, University of Nottingham, Royal Derby Hospital Centre,  
11 Derby, UK.

12 <sup>3</sup>Mitochondrial Metabolism and Ageing Laboratory, Garvan Institute of Medical  
13 Research, Sydney, NSW, 2010, Australia.

14 <sup>4</sup>St Vincent's Clinical School, UNSW Medicine, UNSW Sydney, NSW, 2010,  
15 Australia.

16

17 Short Title: Vitamin D Deficiency and Mitochondrial Function

18 Keywords: Skeletal Muscle, Vitamin D, Mitochondria

19

20 Correspondence:

21 Dr Andrew Philp

22 Mitochondrial Metabolism and Ageing Laboratory

23 Garvan Institute of Medical Research

24 384 Victoria Street, Darlinghurst, Sydney, NSW, 2010, Australia

25 Email: [a.philp@garvan.org.au](mailto:a.philp@garvan.org.au)

26 **Abstract**

27 Vitamin D deficiency is known to be associated with symptoms of skeletal muscle  
28 myopathy including muscle weakness and fatigue. Recently, vitamin D related  
29 metabolites have been linked to the maintenance of mitochondrial function within  
30 skeletal muscle. However, current evidence is limited to *in vitro* models and the  
31 effects of diet-induced vitamin D deficiency upon skeletal muscle mitochondrial  
32 function *in vivo* have received little attention. In order to examine the role of vitamin  
33 D in the maintenance of mitochondrial function *in vivo*, we utilised an established  
34 model of diet-induced vitamin D deficiency in C57BL/6J mice. Mice were fed either a  
35 control (2,200 IU/kg) or a vitamin D deplete (0 IU/kg) diet for periods of 1-, 2- and 3-  
36 months. Skeletal muscle mitochondrial function and ADP sensitivity were assessed  
37 via high-resolution respirometry and mitochondrial protein content via  
38 immunoblotting. As a result of 3-month of diet-induced vitamin D deficiency,  
39 respiration supported via CI+II<sub>P</sub> and ETC were 35% and 37% lower when compared  
40 to vitamin D replete mice ( $P < 0.05$ ). Despite functional alterations, the protein  
41 expression of electron transfer chain subunits remained unchanged in response to  
42 dietary intervention ( $P > 0.05$ ). In conclusion, we report that 3-months of diet-induced  
43 vitamin D deficiency reduced skeletal muscle mitochondrial function in C57BL/6J  
44 mice. Our data, when combined with previous *in vitro* observations, suggests that  
45 vitamin D mediated regulation of mitochondrial function may underlie the  
46 exacerbated muscle fatigue and performance deficits observed during vitamin D  
47 deficiency.

48

49

50

51 **Introduction**

52 Vitamin D deficiency, characterised by serum 25(OH)D levels of  $<50 \text{ nmol.L}^{-1}$ ,  
53 remains prevalent across both Europe and the USA [1 2]. Although the classical  
54 actions of vitamin D within the maintenance of bone health are well established [3-5],  
55 a number of non-classical actions have recently been identified including the  
56 maintenance of skeletal muscle function [6].

57

58 Within human populations, multiple observational studies have reported a positive  
59 association between serum 25(OH)D, skeletal muscle strength and lower extremity  
60 function in older individuals [7-9]. Furthermore, the supplementation of vitamin D has  
61 also been reported to increase muscle strength within this population [10 11].  
62 Despite these associations, studies of this design are unable to infer causality. In  
63 addition, isolating the effects of vitamin D status within older populations is often  
64 difficult given individuals may suffer from a number of pre-existing conditions that  
65 may interfere with vitamin D status [12]. These difficulties highlight the importance of  
66 model systems that allow for the manipulation and isolation of vitamin D status in  
67 order to study the precise role of vitamin D within skeletal muscle.

68

69 In order to study the impact of vitamin D deficiency on skeletal muscle function, a  
70 number of animal models have been utilised. A dysregulation of vitamin D status can  
71 be achieved via dietary means [13-16], a reduction in sunlight exposure [13] or by  
72 the administration of ethane 1-hydroxy-1, 1-diphosphonate which blocks the  
73 production of  $1\alpha,25\text{-dihydroxyvitamin D}_3$  ( $1\alpha,25(\text{OH})_2\text{D}_3$ ) [16]. Diet-induced vitamin D  
74 deficiency has been shown to result in symptoms of skeletal muscle myopathy  
75 including impaired contraction kinetics, skeletal muscle weakness, as well as

76 decreases in muscle force in both chicks and rats [13 14 17]. In order to isolate the  
77 effects of vitamin D alone and offset the observed hypocalcemia and  
78 hypophosphatemia that are associated with the induction of vitamin D deficiency  
79 [17], diets with increased calcium and phosphate have been utilised [15]. However,  
80 despite the administration of this rescue diet, mice still display reduced grip strength  
81 and an increase in *Myostatin* gene expression [15], a known negative regulator of  
82 muscle mass [18]. Similarly, mice fed this diet chronically (8-12 months) show similar  
83 impairments in physical performance including; reduced grip endurance, sprint  
84 speed and stride length [19].

85

86 The observed impairments in physical performance with vitamin D deficiency may be  
87 linked to skeletal muscle mitochondrial function [20 21]. *In vitro*, vitamin D related  
88 metabolites are able to increase mitochondrial function in both immortalised and  
89 primary skeletal muscle cell lines [22-25]. Furthermore, we recently observed  
90 significant impairments in mitochondrial function in Vitamin D Receptor (VDR) loss-  
91 of-function C2C12 myoblasts [26]. In humans, the supplementation of vitamin D  
92 within a cohort of severely deficient individuals resulted in a reduced  
93 phosphocreatine (PCr) recovery time, as measured non-invasively by 31-  
94 phosphorous magnetic resonance spectroscopy (31-P MRS) [20]. Whilst skeletal  
95 muscle mitochondrial content seems to remain unchanged following diet-induced  
96 vitamin D deficiency in mice [19], the functional characteristics of the mitochondria  
97 remain largely underexplored. Therefore, we aimed to determine the effects of diet-  
98 induced vitamin D deficiency upon skeletal muscle mitochondrial function in  
99 C57BL/6J mice.

100

101

102

## 103 **Methods**

### 104 **Ethical Approval**

105 Ethical approval was granted by the Garvan Institute and St. Vincent's Hospital  
106 Animal Experimentation Ethics Committee (approval number 18/19), fulfilling the  
107 requirements of the NHMRC and the NSW State Government, Australia. All animal  
108 handling was carried out by trained personnel and all procedures were carried out  
109 according to the Australian code of practice for the care and use of animals for  
110 scientific purposes 8<sup>th</sup> edition [27]. Male C57BL/6JAusb mice were received at 10-  
111 weeks of age and housed communally in a temperature controlled environment ( $22 \pm$   
112  $0.5^{\circ}\text{C}$ ) with a 12 h light-dark cycle.

113

### 114 **Composition of Diet**

115 Following 1-week acclimation in which mice were fed a standard chow diet, mice  
116 were placed on either a vitamin D-control diet (SF085-034, Speciality Feeds, Glen  
117 Forest, NSW) or a vitamin D-deplete diet (SF085-003, Speciality Feeds, Glen Forest,  
118 NSW) for periods of 1- (n = 10/group), 2- (n = 6/group) or 3-months (n = 6/group).  
119 The vitamin D deplete contains no vitamin D (cholecalciferol 0 IU/kg) but increased  
120 calcium (2%) and phosphorous (1.2%) in order to maintain normal mineral  
121 homeostasis. Previously, this dietary intervention has been shown to successfully  
122 induce vitamin D deficiency following 1-month of dietary intervention [15]. The  
123 vitamin D control diet contains vitamin D (cholecalciferol 2,200 IU/kg), calcium (1%)  
124 and phosphorous (0.7%).

125

126 **Assessment of Food Intake**

127 Food intake was assessed on a monthly basis at 1-, 2- and 3-months of dietary  
128 intervention. The weight of the food within the cage was recorded and subsequently  
129 re-weighed following a period of 24 h. The amount of food consumed was then  
130 divided by the number of mice within the cage and reported as food intake in grams  
131 per mouse.

132

133 **Assessment of Body Composition**

134 Body weight was obtained on a weekly basis throughout the dietary intervention  
135 periods. In addition, prior to each measurement of body composition mice were  
136 briefly weighed. Body composition was assessed upon arrival (10-weeks of age) and  
137 then following 1-, 2- and 3-months of dietary intervention using the EchoMRI  
138 (EchoMRI LLC, Houston, USA).

139

140 **Tissue Collection**

141 Tissue collections were completed following 1-, 2- and 3-months of dietary  
142 intervention. All samples were excised from fasted (2 h) mice following isoflurane  
143 (5%) anesthetization. Following collection, a blood sample was taken via cardiac  
144 puncture and animal terminated via cervical dislocation. All tissues were rinsed in  
145 sterile saline, blotted dry, weighed, and frozen in liquid nitrogen. A small portion (~20  
146 mg) of the red gastrocnemius was removed before freezing and used for high-  
147 resolution respirometry. All further tissue samples were stored at -80°C for  
148 subsequent analysis.

149

150 **Tissue Processing**

151 Small portions of red gastrocnemius muscle (~20 mg) were removed and placed in  
152 ice-cold BIOPS buffer (2.77 mM CaK<sub>2</sub>EGTA, 7.23 mM K<sub>2</sub>EGTA, 5.77 mM Na<sub>2</sub>ATP,  
153 6.56 mM MgCl<sub>2</sub>·6H<sub>2</sub>O, 20 mM Taurine, 15 mM Na<sub>2</sub>Phosphocreatine, 20 mM  
154 Imidazole, 0.5 mM Dithiothreitol, 50 mM MES Hydrate, pH 7.1, 290 mOsm). Blood  
155 samples were allowed to coagulate at room temperature for 10 minutes before being  
156 placed on ice. Blood samples were then centrifuged at 14,000 g for 10 minutes and  
157 the resulting supernatant was removed and stored at -80°C for further analysis.

158

### 159 **Analysis of Serum Calcium**

160 Serum calcium was measured using a Calcium Detection Assay kit (Abcam,  
161 Cambridge, UK). Serum samples were diluted 1:10 and manufacturers instructions  
162 were followed. The assay plate was read at 575 nm using a CLARIOstar microplate  
163 reader (BMG Labtech, Victoria, Australia). Serum calcium concentrations are  
164 reported in mM.

165

### 166 **High-Resolution Respirometry**

167 High-resolution respirometry was conducted in MiR05 (2 ml) with the addition of  
168 blebbistatin (25 μM) using the OROBOROS Oxygraph-2K (Oroboros Instruments,  
169 Corp., Innsbruck, AT) with stirring at 750 rpm at 37°C. Oxygen within the chamber  
170 was maintained between 150-220 μM for each experiment. Prior to the addition of  
171 the fibre bundles to the chamber, bundles were blotted dry and weighed. Bundles  
172 totalling 2.5-5.0 mg were added to each chamber. Firstly, pyruvate (10 mM) and  
173 malate (2 mM) were added in assessment of complex I related leak (Cl<sub>L</sub>). ADP was  
174 then titrated in step-wise increments (100-6000 μM) followed by the addition of  
175 glutamate (10 mM) to assess phosphorylating respiration (Cl<sub>P</sub>). The addition of

176 succinate (10 mM) followed to assess respiration support via complex II (CI+II<sub>P</sub>).  
177 Cytochrome c (cyt c) (10 μM) was added in order to check outer mitochondrial  
178 membrane integrity. The partial loss of cyt c during fibre preparation may limit  
179 respiration however, no fibre preparation exhibited an increase of >10%. Carbonyl  
180 cyanide 3-chlorophenylhydrazone (CCCP) was titrated in a step-wise manner (0.5 to  
181 2.5 μM) until the maximal capacity of the electron transport chain (ETC) was  
182 reached. Finally, antimycin A (2.5 μM) was injected in order to determine non-  
183 mitochondrial oxygen consumption.

184

185 The apparent  $K_m$  for ADP was determined through the Michaelis-Menten enzyme  
186 kinetics – fitting model ( $Y = V_{max} * X / (K_m + X)$ ), where  $X =$  (free ADP; ADP<sub>f</sub>), using  
187 Prism (GraphPad Software, Inc., La Jolla, CA) as previously described [28]. Flux  
188 control ratios (FCR) was calculated by setting CCCP stimulated respiration as 1 and  
189 antimycin A respiration as 0.

190

### 191 **Immunoblotting**

192 Gastrocnemius samples were powdered on dry ice using a Cellcrusher™ tissue  
193 pulverizer (Cellcrusher Ltd, Cork, Ireland) and homogenized via shaking in a  
194 FastPrep 24 5G (MP Biochemicals, Santa Ana, California, USA) at 6.0 m·s<sup>-1</sup> for 80 s  
195 in a 10-fold mass of ice-cold sucrose lysis buffer (50 mM Tris pH 7.5; 270 mM  
196 sucrose; 1 mM EDTA; 1 mM EGTA; 1% Triton X-100; 50 mM sodium fluoride; 5 mM  
197 sodium pyrophosphate decahydrate; 25 mM beta-glycerolphosphate). Inhibitors  
198 were added fresh on the day of use and included 1 cOmplete™ protease inhibitor  
199 cocktail EDTA free tablet (Roche, Basel, Switzerland) and Phosphatase Inhibitor  
200 Cocktail 3 both purchased from Sigma-Aldrich (Sigma-Aldrich, NSW, Australia).



201 Samples were then centrifuged for 10 min at 8,000 *g* at 4°C to remove any insoluble  
202 material. Protein concentrations were determined using the DC protein assay as per  
203 manufacturer's instructions (Bio-Rad, NSW, Australia). An equal volume of protein  
204 (30 µg) was separated by SDS-PAGE on 12.5% gels at a constant current of 23 mA  
205 per gel for ~60 minutes. Proteins were then transferred on to BioTrace NT  
206 nitrocellulose membranes (Pall Life Sciences, Pensacola, Florida, USA) using a wet  
207 transfer system at 100 V for 1 h. Membranes were then stained in Ponceau S  
208 (Sigma-Aldrich, NSW, Australia) and imaged to check for even loading and transfer.  
209 Membranes were then blocked for 1 h in 3% dry-milk in tris-buffered saline with  
210 tween (TBS-T). Membranes were incubated overnight in primary antibodies at 4°C.  
211 Following primary antibody incubation, membranes were washed three times in TBS-  
212 T and subsequently incubated in the appropriate horseradish peroxidase-conjugated  
213 secondary antibody at room temperature for 1 h. Membranes were again washed  
214 three times in TBS-T prior to imaging. Images were captured using the ChemiDoc  
215 (Bio-Rad, NSW, Australia) and quantified using ImageJ.

216

## 217 **Antibodies**

218 MitoProfile OXPHOS antibody cocktail (110413) was from Abcam and used at a  
219 concentration of 1:1,000. Anti-mouse (7076) secondary antibody was used at a  
220 concentration of 1:10,000 in TBS-T and was from Cell Signaling Technology.

221

## 222 **Statistical Analysis**

223 Statistical analysis was performed using Prism version 7 (GraphPad Software  
224 Incorporated, La Jolla, CA, USA). Differences between 1-, 2- and 3-month vitamin D  
225 replete and deplete mice were determined by two-way ANOVA with Bonferroni

226 correction for multiple comparisons. Differences between vitamin D deplete and  
227 replete mice in mitochondrial respiration in response to ADP titration were  
228 determined by multiple t-test. All values are presented as mean  $\pm$  SD. Statistical  
229 significance was set at  $P < 0.05$ .

230

231

## 232 **Results**

### 233 **Body Composition Following Diet-Induced Vitamin D Deficiency**

234 Body weight increased across time when mice were compared at the 1-, 2- and 3-  
235 month time-points ( $P < 0.001$ ) (Fig. 1A). However, no differences in body weight  
236 were observed when comparing vitamin D replete and deplete mice ( $P > 0.05$ ) (Fig.  
237 1A). Further assessment of body composition revealed no differences in absolute  
238 lean mass ( $P > 0.05$ ) (Fig. 1C) however, when expressed as a percentage of body  
239 weight, lean mass was lower when compared across dietary intervention time-points  
240 ( $P < 0.001$ ) (Fig. 1D). Further analysis revealed that lean mass as a percentage of  
241 body weight was 16% lower at 3-months when vitamin D deplete mice were  
242 compared with the 1-month vitamin D deplete ( $P < 0.001$ ) (Fig. 1D). Although this is  
243 indicative of a loss of lean mass with vitamin D deficiency, this effect was potentially  
244 driven by a higher lean mass as a percentage of body weight at the 1-month time-  
245 point in vitamin D deplete mice ( $P = 0.039$ ) (Fig. 1D). Both absolute and percentage  
246 of body weight fat mass increased across time in both dietary groups ( $P < 0.001$ )  
247 (Fig. 1E-F). Furthermore, fat mass as a percentage of body weight was 60% higher  
248 in the vitamin D replete mice when compared with vitamin D deplete at the 1-month  
249 time point ( $P = 0.044$ ) (Fig. 1F). Despite differences in body composition, no

250 difference in food intake was observed between time points ( $P > 0.05$ ) and groups ( $P$   
251  $> 0.05$ ) (Fig. 1B).

252

### 253 **Skeletal Muscle Mass**

254 Given the alterations in total lean mass, we determined whether individual skeletal  
255 muscle mass was effected by diet-induced Vitamin D deficiency. Crude analysis of  
256 skeletal muscle wet weight revealed no differences in the mass of the gastrocnemius  
257 in response to either dietary intervention ( $P = 0.408$ ) or time point ( $P = 0.103$ ) (Table  
258 1). Overall, the mass of the quadriceps increased over time ( $P = 0.004$ ) however,  
259 this was not changed by dietary intervention ( $P = 0.951$ ) (Table 1). Collectively,  
260 triceps mass was higher when vitamin D replete mice were compared with deplete  
261 ( $P = 0.041$ ) although, post-hoc analysis revealed no difference between groups at  
262 individual time points ( $P > 0.05$ ) (Table 1).

263

### 264 **Serum Calcium**

265 Similar to previous reports [15], we observed no change in serum calcium  
266 irrespective of dietary group or time point ( $P > 0.05$ ) (Fig. 2A).

267

### 268 **Mitochondrial Function**

269 In response to both pyruvate and malate alone, we observed no change in  $Cl_L$  ( $P >$   
270  $0.05$ ) (Fig. 3A). However, following the addition of ADP,  $Cl_P$  respiration increased  
271 across the 1, 2 and 3-month time points ( $P = 0.048$ ) (Fig. 3B). Furthermore,  
272 respiration was 85% and 96% higher at the 2- ( $P = 0.015$ ) and 3-month ( $P = 0.006$ )  
273 time-points respectively when compared with 1-month in vitamin D replete mice (Fig.  
274 3B). Similarly, higher respiratory capacities during  $Cl+II_P$  respiration and the maximal

275 capacity of the ETC were observed in the 2- and 3-month vitamin D replete mice  
276 when compared with the 1-month ( $P < 0.05$ ) (Fig. 3C-D). In addition, 3-months of  
277 diet-induced vitamin D deficiency resulted in 35% and 37% lower respiratory rates  
278 during CI+II<sub>p</sub> ( $P = 0.035$ ) and maximal ETC capacity ( $P = 0.015$ ) when compared to  
279 vitamin D deplete mice at the same time-point (Fig. 3C-D). We also analysed to  
280 above data as a flux control ratio which provides a method for internal normalisation  
281 [31 32]. Despite the observed changes reported above, flux control ratios revealed  
282 no differences in mitochondrial respiration supported via complex I alone ( $P > 0.05$ )  
283 or complex I and II in combination ( $P > 0.05$ ) (Fig. 3E-F).

284

### 285 **ADP Sensitivity**

286 Commonly, the assessment of mitochondrial function is performed under saturating  
287 concentrations of ADP [31 32] which may not be biologically relevant. Therefore, we  
288 assessed mitochondrial function in response to a titration of ADP from biologically  
289 relevant to saturating concentrations [28 33]. We observed no differences in  
290 mitochondrial respiration throughout the titration of ADP between vitamin D replete  
291 and deplete mice ( $P > 0.05$ ) (Fig. 4A-C). Furthermore, no differences were observed  
292 in the apparent  $K_m$  for ADP in response to either dietary intervention ( $P > 0.05$ ) or  
293 time point ( $P > 0.05$ ) (Fig. 4D).

294

### 295 **Mitochondrial Protein Content**

296 Finally, given the observed decrements in mitochondrial function associated with  
297 vitamin D deficiency, we sort to assess mitochondrial protein content following diet-  
298 induced vitamin D deficiency. We observed no changes in complex I (NDUFB8),  
299 complex II (SDHB) and complex IV (UQCRC2) protein content when compared

300 irrespective of time point or vitamin D diet ( $P > 0.05$ ) (Fig. 5A-B, D). Interestingly,  
301 both complex III (MTCO1) and complex V (ATP5A) were decreased across time ( $P <$   
302  $0.05$ ) however, there were no differences between dietary groups ( $P > 0.05$ ) (Fig. 5C  
303 & E).

304

## 305 **Discussion**

306 Vitamin D deficiency has been linked to reductions in muscle function, however the  
307 specific role of Vitamin D on mitochondrial function is less established. Therefore,  
308 the aim of the present study was to directly examine the effects of diet-induced  
309 vitamin D deficiency upon skeletal muscle mitochondrial function in C57BL/6J mice.  
310 Utilising the current gold standard method to assess mitochondrial function in  
311 permeabilised skeletal muscle fibres [29 30], we report that 3-months of diet-induced  
312 vitamin D deficiency reduces mitochondrial respiration supported via  $CI+II_P$  and the  
313 maximal capacity of the ETC (Fig. 3C-D). Interestingly, despite the functional  
314 changes, we observed no differences in mitochondrial protein content following the  
315 induction of diet-induced vitamin D deficiency (Fig. 5A-F). In addition, 1-month of  
316 diet-induced vitamin D deficiency resulted in an increase in lean mass (Fig. 1D) and  
317 a decrease in fat mass (Fig. 1F) as a percentage of body weight, although these  
318 effects were transient as they did not manifest over 2- and 3-months of dietary  
319 intervention. Furthermore, diet-induced vitamin D deficiency resulted in a decrease in  
320 lean mass as a percentage of body weight across the 3-month time period (Fig. 1D).  
321 Despite this, no changes in body weight, lean mass, fat mass or food intake were  
322 apparent when comparing vitamin D replete to the deplete group following 3-months  
323 of dietary intervention (Fig. 1A-F).

324

325 The ability of vitamin D and related metabolites to increase skeletal muscle  
326 mitochondrial function in immortalised and primary cell lines has been well  
327 established [22-25]. Despite this, there is little evidence for the effects of vitamin D  
328 status upon skeletal muscle mitochondrial function *in vivo*. To date, just one study  
329 has examined skeletal muscle mitochondrial function, as measured non-invasively  
330 via <sup>31</sup>P MRS, in a cohort of severely deficient patients [20]. The authors reported a  
331 decrease in PCr recovery time following supplementation with vitamin D, indicative of  
332 increased oxidative phosphorylation [20]. However the study followed an open label  
333 design, making the extrapolation of this data unclear. In order to directly assess the  
334 effects of vitamin D status upon skeletal muscle mitochondrial function, we utilised a  
335 mouse model of diet-induced vitamin D deficiency. This model allows for the  
336 manipulation of vitamin D status without altering mineral homeostasis [15]. Following  
337 3-months of diet-induced vitamin D deficiency, we report that respiration supported  
338 via CI+II<sub>P</sub> and the maximal capacity of the ETC is lower when compared to vitamin D  
339 replete mice at the same time-point. Reduced rates of respiration following 3-months  
340 of diet-induced vitamin D deficiency were mediated by increased respiration in the  
341 vitamin D replete cohort as opposed to a reduction in vitamin D deplete mice.  
342 Following internal normalisation, the above alterations in mitochondrial function were  
343 no longer apparent, suggesting the changes observed were due to alterations in  
344 mitochondrial quantity as opposed to quality. Therefore, in order to ascertain whether  
345 these increases were mediated by an increase in mitochondrial protein abundance,  
346 we assessed the protein content of ETC subunits I-V. Despite functional  
347 impairments, we observed no differences in markers of mitochondrial protein content  
348 within skeletal muscle following the induction of vitamin D deficiency. Therefore, this  
349 suggests that vitamin D deficiency alters mitochondrial function independently of

350 mitochondrial content. Similar observations have been made *in vitro* following either  
351 the treatment of skeletal muscle cell lines with vitamin D metabolites or the knock-  
352 down of the VDR [22 26]. In addition, within the skeletal muscle of the recently  
353 developed skeletal muscle muscle-specific VDR-KD mouse, mitochondrial protein  
354 content remained unchanged [34]. The further examination of mitochondrial function  
355 in this mouse model would help to determine whether the effects of vitamin D  
356 deficiency upon skeletal muscle mitochondrial are a direct result of vitamin D related  
357 signalling.

358

359 In addition, we also sought to determine the effects of diet-induced vitamin D  
360 deficiency upon body composition within C57BL/6J mice. Previously, no differences  
361 in body weight and lean mass were observed following 12-months of diet-induced  
362 deficiency in male C57BL/6J mice [19]. In female mice however, 12-months of diet-  
363 induced vitamin D deficiency resulted in reductions in body weight, lean mass and fat  
364 mass [35]. Similar to previous reports in male mice, we observed no differences  
365 between the vitamin D replete and deplete groups in body weight, lean mass, fat  
366 mass or food intake at the 3-month time point. We did however observe a reduction  
367 in lean mass as a percentage of body weight from 1- to 3-months in vitamin D  
368 deplete mice whereas replete mice remained stable over the same time period. This  
369 may in part be driven by the fact we also observed an increase in lean mass as a  
370 percentage of body weight following 1-month of diet-induced deficiency. Despite  
371 minimal differences in body composition, previous data suggests that vitamin D  
372 deficiency impairs physical function in mice [15 19]. Therefore, functional measures  
373 of muscle performance may be more relevant to assess the effects of vitamin D  
374 deficiency within skeletal muscle. However, it should also be noted that those with

375 serum concentrations of 25(OH)D <25 nmol.L<sup>-1</sup> are at a greater risk of developing  
376 sarcopenia [36]. Given the effects of vitamin D deficiency and supplementation seem  
377 to be most potent in older individuals, the induction of vitamin D deficiency in aging  
378 mouse models may reveal more potent effects on skeletal muscle mass.

379

380 In conclusion, we report that mitochondrial function (CI+II<sub>P</sub> and ETC) is reduced in  
381 C57BL/6J mice following 3-months of diet-induced vitamin D deficiency. These  
382 effects are not mediated by alterations in mitochondrial protein content suggesting  
383 vitamin D deficiency directly effects the mitochondrial respiratory machinery. Similar  
384 to others, we observed minimal differences in body composition following 3-months  
385 of diet-induced vitamin D deficiency in male C57BL/6J mice [19 37]. Finally our data  
386 provides evidence that vitamin D status is an important determinant of skeletal  
387 muscle mitochondrial function *in vivo* thereby supporting previous *in vitro*  
388 observations.

389

### 390 **Grants**

391 The MRC-ARUK Centre for Musculoskeletal Ageing Research was funded through  
392 grants from the Medical Research Council [grant number MR/K00414X/1] and  
393 Arthritis Research UK [grant number 19891] awarded to the Universities of  
394 Birmingham and Nottingham. S.P.A. was funded by a MRC-ARUK Doctoral Training  
395 Partnership studentship, joint funded by the College of Life and Environmental  
396 Sciences, University of Birmingham.

397

### 398 **Disclosures**

399 No conflicts of interest, financial or otherwise, are declared by the authors.



400

## 401 **Author Contributions**

402 S.P.A and A.P conceived and designed research. S.P.A, G.F, A.M.P performed  
403 experiments and S.P.A analysed data, interpreted results and prepared figures.  
404 S.P.A, P.J.A and A.P drafted the manuscript. All authors approved the final version  
405 of the manuscript.

406

407

408

409

## 410 **References**

- 411 1. Cashman KD, Dowling KG, Skrabakova Z, et al. Vitamin D deficiency in Europe: pandemic?  
412 Am J Clin Nutr 2016;**103**(4):1033-44 doi: 10.3945/ajcn.115.120873[published Online  
413 First: Epub Date] |.
- 414 2. Forrest KY, Stuhldreher WL. Prevalence and correlates of vitamin D deficiency in US  
415 adults. Nutr Res 2011;**31**(1):48-54 doi: 10.1016/j.nutres.2010.12.001[published  
416 Online First: Epub Date] |.
- 417 3. Ham AW, Lewis MD. Hypervitaminosis D Rickets: The Action of Vitamin D. British Journal  
418 of Experimental Pathology 1934;**15**(4):228-34
- 419 4. Bhan A, Rao AD, Rao DS. Osteomalacia as a result of vitamin D deficiency. Endocrinology  
420 and metabolism clinics of North America 2010;**39**(2):321-31, table of contents doi:  
421 10.1016/j.ecl.2010.02.001[published Online First: Epub Date] |.
- 422 5. Rizzoli R, Boonen S, Brandi ML, Burlet N, Delmas P, Reginster JY. The role of calcium and  
423 vitamin D in the management of osteoporosis. Bone 2008;**42**(2):246-9 doi:  
424 10.1016/j.bone.2007.10.005[published Online First: Epub Date] |.
- 425 6. Girgis CM, Clifton-Bligh RJ, Hamrick MW, Holick MF, Gunton JE. The roles of vitamin D in  
426 skeletal muscle: form, function, and metabolism. Endocrine reviews 2013;**34**(1):33-  
427 83 doi: 10.1210/er.2012-1012[published Online First: Epub Date] |.
- 428 7. Wicherts IS, van Schoor NM, Boeke AJ, et al. Vitamin D status predicts physical  
429 performance and its decline in older persons. J Clin Endocrinol Metab  
430 2007;**92**(6):2058-65 doi: 10.1210/jc.2006-1525[published Online First: Epub Date] |.
- 431 8. Bischoff-Ferrari HA, Dietrich T, Orav EJ, et al. Higher 25-hydroxyvitamin D concentrations  
432 are associated with better lower-extremity function in both active and inactive  
433 persons aged > or =60 y. Am J Clin Nutr 2004;**80**(3):752-8 doi:  
434 10.1093/ajcn/80.3.752[published Online First: Epub Date] |.
- 435 9. Houston DK, Toozé JA, Neiberg RH, et al. 25-hydroxyvitamin D status and change in  
436 physical performance and strength in older adults: the Health, Aging, and Body

- 437 Composition Study. American journal of epidemiology 2012;**176**(11):1025-34 doi:  
438 10.1093/aje/kws147[published Online First: Epub Date] |.
- 439 10. Beaudart C, Buckinx F, Rabenda V, et al. The effects of vitamin D on skeletal muscle  
440 strength, muscle mass, and muscle power: a systematic review and meta-analysis of  
441 randomized controlled trials. J Clin Endocrinol Metab 2014;**99**(11):4336-45 doi:  
442 10.1210/jc.2014-1742[published Online First: Epub Date] |.
- 443 11. Stockton KA, Mengersen K, Paratz JD, Kandiah D, Bennell KL. Effect of vitamin D  
444 supplementation on muscle strength: a systematic review and meta-analysis.  
445 Osteoporos Int 2011;**22**(3):859-71 doi: 10.1007/s00198-010-1407-y[published Online  
446 First: Epub Date] |.
- 447 12. Duncan A, Talwar D, McMillan DC, Stefanowicz F, O'Reilly DS. Quantitative data on the  
448 magnitude of the systemic inflammatory response and its effect on micronutrient  
449 status based on plasma measurements. Am J Clin Nutr 2012;**95**(1):64-71 doi:  
450 10.3945/ajcn.111.023812[published Online First: Epub Date] |.
- 451 13. Pleasure D, Wyszynski B, Sumner A, et al. Skeletal muscle calcium metabolism and  
452 contractile force in vitamin D-deficient chicks. The Journal of clinical investigation  
453 1979;**64**(5):1157-67 doi: 10.1172/jci109569[published Online First: Epub Date] |.
- 454 14. Rodman JS, Baker T. Changes in the kinetics of muscle contraction in vitamin D-depleted  
455 rats. Kidney international 1978;**13**(3):189-93
- 456 15. Girgis CM, Cha KM, Houweling PJ, et al. Vitamin D Receptor Ablation and Vitamin D  
457 Deficiency Result in Reduced Grip Strength, Altered Muscle Fibers, and Increased  
458 Myostatin in Mice. Calcified tissue international 2015;**97**(6):602-10 doi:  
459 10.1007/s00223-015-0054-x[published Online First: Epub Date] |.
- 460 16. Pointon JJ, Francis MJ, Smith R. Effect of vitamin D deficiency on sarcoplasmic reticulum  
461 function and troponin C concentration of rabbit skeletal muscle. Clinical science  
462 (London, England : 1979) 1979;**57**(3):257-63
- 463 17. Schubert L, DeLuca HF. Hypophosphatemia is responsible for skeletal muscle weakness  
464 of vitamin D deficiency. Archives of biochemistry and biophysics 2010;**500**(2):157-61  
465 doi: 10.1016/j.abb.2010.05.029[published Online First: Epub Date] |.
- 466 18. McPherron AC, Lawler AM, Lee SJ. Regulation of skeletal muscle mass in mice by a new  
467 TGF-beta superfamily member. Nature 1997;**387**(6628):83-90 doi:  
468 10.1038/387083a0[published Online First: Epub Date] |.
- 469 19. Seldeen KL, Pang M, Leiker MM, et al. Chronic vitamin D insufficiency impairs physical  
470 performance in C57BL/6J mice. Aging (Albany NY) 2018;**10**(6):1338-55 doi:  
471 10.18632/aging.101471[published Online First: Epub Date] |.
- 472 20. Sinha A, Hollingsworth KG, Ball S, Cheetham T. Improving the vitamin D status of vitamin  
473 D deficient adults is associated with improved mitochondrial oxidative function in  
474 skeletal muscle. J Clin Endocrinol Metab 2013;**98**(3):E509-13 doi: 10.1210/jc.2012-  
475 3592[published Online First: Epub Date] |.
- 476 21. Bouillon R, Verstuyf A. Vitamin D, Mitochondria, and Muscle. The Journal of Clinical  
477 Endocrinology & Metabolism 2013;**98**(3):961-63 doi: 10.1210/jc.2013-  
478 1352[published Online First: Epub Date] |.
- 479 22. Ryan ZC, Craig TA, Folmes CD, et al. 1alpha,25-Dihydroxyvitamin D3 Regulates  
480 Mitochondrial Oxygen Consumption and Dynamics in Human Skeletal Muscle Cells. J  
481 Biol Chem 2016;**291**(3):1514-28 doi: 10.1074/jbc.M115.684399[published Online  
482 First: Epub Date] |.

- 483 23. Ryan ZC, Craig TA, Wang X, et al. 1 $\alpha$ ,25-dihydroxyvitamin D<sub>3</sub> mitigates cancer cell  
484 mediated mitochondrial dysfunction in human skeletal muscle cells. *Biochemical and*  
485 *biophysical research communications* 2018;**496**(2):746-52 doi:  
486 10.1016/j.bbrc.2018.01.092[published Online First: Epub Date] |.
- 487 24. Schnell DM, Walton RG, Vekaria HJ, et al. Vitamin D produces a perilipin 2-dependent  
488 increase in mitochondrial function in C2C12 myotubes. *The Journal of nutritional*  
489 *biochemistry* 2018;**65**:83-92 doi: 10.1016/j.jnutbio.2018.11.002[published Online  
490 First: Epub Date] |.
- 491 25. Romeu Montenegro K, Maron Carlessi R, Fernandes Cruzat V, Newsholme P. Effects of  
492 vitamin D on primary human skeletal muscle cell proliferation, differentiation,  
493 protein synthesis and bioenergetics. *The Journal of steroid biochemistry and*  
494 *molecular biology* 2019:105423 doi: 10.1016/j.jsbmb.2019.105423[published Online  
495 First: Epub Date] |.
- 496 26. Ashcroft SP, Bass JJ, Kazi AA, Atherton PJ, Philp A. The Vitamin D Receptor (VDR)  
497 Regulates Mitochondrial Function in C2C12 Myoblasts. *American journal of*  
498 *physiology. Cell physiology* 2020 doi: 10.1152/ajpcell.00568.2019[published Online  
499 First: Epub Date] |.
- 500 27. Health N, Council MR, Council AR. *Australian Code of Practice for the Care and Use of*  
501 *Animals for Scientific Purposes*: National Health and Medical Research Council, 2013.
- 502 28. Perry CG, Kane DA, Lin CT, et al. Inhibiting myosin-ATPase reveals a dynamic range of  
503 mitochondrial respiratory control in skeletal muscle. *The Biochemical journal*  
504 2011;**437**(2):215-22 doi: 10.1042/bj20110366[published Online First: Epub Date] |.
- 505 29. Lanza IR, Nair KS. Mitochondrial metabolic function assessed in vivo and in vitro. *Current*  
506 *opinion in clinical nutrition and metabolic care* 2010;**13**(5):511-7 doi:  
507 10.1097/MCO.0b013e32833cc93d[published Online First: Epub Date] |.
- 508 30. Picard M, Taivassalo T, Ritchie D, et al. Mitochondrial structure and function are  
509 disrupted by standard isolation methods. *PloS one* 2011;**6**(3):e18317 doi:  
510 10.1371/journal.pone.0018317[published Online First: Epub Date] |.
- 511 31. Pesta D, Gnaiger E. High-resolution respirometry: OXPHOS protocols for human cells and  
512 permeabilized fibers from small biopsies of human muscle. *Methods in molecular*  
513 *biology (Clifton, N.J.)* 2012;**810**:25-58 doi: 10.1007/978-1-61779-382-0\_3[published  
514 Online First: Epub Date] |.
- 515 32. Canto C, Garcia-Roves PM. High-Resolution Respirometry for Mitochondrial  
516 Characterization of Ex Vivo Mouse Tissues. *Current protocols in mouse biology*  
517 2015;**5**(2):135-53 doi: 10.1002/9780470942390.mo140061[published Online First:  
518 Epub Date] |.
- 519 33. Miotto PM, LeBlanc PJ, Holloway GP. High-Fat Diet Causes Mitochondrial Dysfunction as  
520 a Result of Impaired ADP Sensitivity. *Diabetes* 2018;**67**(11):2199 doi: 10.2337/db18-  
521 0417[published Online First: Epub Date] |.
- 522 34. Girgis CM, Cha KM, So B, et al. Mice with myocyte deletion of vitamin D receptor have  
523 sarcopenia and impaired muscle function. *Journal of cachexia, sarcopenia and*  
524 *muscle* 2019 doi: 10.1002/jcsm.12460[published Online First: Epub Date] |.
- 525 35. Belenchia AM, Johnson SA, Kieschnick AC, Rosenfeld CS, Peterson CA. Time Course of  
526 Vitamin D Depletion and Repletion in Reproductive-age Female C57BL/6 Mice.  
527 *Comparative medicine* 2017;**67**(6):483-90
- 528 36. Visser M, Deeg DJ, Lips P. Low vitamin D and high parathyroid hormone levels as  
529 determinants of loss of muscle strength and muscle mass (sarcopenia): the

530 Longitudinal Aging Study Amsterdam. J Clin Endocrinol Metab 2003;**88**(12):5766-72  
531 doi: 10.1210/jc.2003-030604[published Online First: Epub Date]].

532 37. Seldeen KL, Pang M, Rodríguez-Gonzalez M, et al. A mouse model of vitamin D  
533 insufficiency: is there a relationship between 25(OH) vitamin D levels and obesity?  
534 Nutrition & metabolism 2017;**14** doi: 10.1186/s12986-017-0174-6[published Online  
535 First: Epub Date]].

536

537

538

539

540

541

542

#### 543 **Figure Legends**

544

545 **Figure 1.** Assessment of body composition and food intake in vitamin D replete and  
546 deplete C57BL/6J mice. A, increase in body weight across dietary period with no  
547 differences between differing vitamin D diets (n = 6-10/group). B, no difference in  
548 food intake was observed following dietary intervention (n = 5-6 cages/group). C-D,  
549 absolute lean mass remained unchanged whilst lean mass as a percentage of body  
550 weight was significantly lower in the 3-month vitamin D deplete when compared to  
551 the 1-month (n = 6-10/group). E-F, Absolute and percentage of body weight fat mass  
552 increased across the dietary period irrespective of dietary intervention. Data mean  $\pm$   
553 SD. <sup>b</sup> Main effect for time ( $P < 0.05$ ), <sup>c</sup> Main effect group x time interaction ( $P < 0.05$ ),  
554 \* ( $P < 0.05$ ).

555

556 **Table 1.** Assessment of skeletal muscle wet weight following the induction of diet-  
557 induced vitamin D deficiency (n = 6-10/group). Data mean  $\pm$  SD.

558

559 **Figure 2.** Serum calcium in response to the induction of diet-induced vitamin D  
560 deficiency (n = 5-10/group). Data mean  $\pm$  SD.

561

562 **Figure 3.** Assessment of skeletal muscle mitochondrial respiration in response to  
563 diet-induced vitamin D deficiency. A,  $Cl_L$  remains unchanged irrespective of dietary  
564 intervention (n = 4-8/group). B, Respiration supported via  $Cl_P$  is higher in the 2- and  
565 3-month vitamin D replete mice when compared with the 1-month (n = 5-8/group). C-  
566 D, Respiration supported via  $Cl+II_P$  and the maximal capacity of the ETC is  
567 increased in the vitamin D replete mice and higher at the 3-month time point when  
568 compared to vitamin D deplete (n = 5-8/group). E-F, alteration in absolute rates of  
569 respiration are diminished when internally normalised (n = 5-8/group). Data mean  $\pm$   
570 SD. <sup>b</sup> Main effect for time ( $P < 0.05$ ), <sup>c</sup> Main effect group x time interaction ( $P < 0.05$ ),  
571 \* ( $P < 0.05$ ).

572

573 **Figure 4.** Assessment of skeletal muscle mitochondrial ADP sensitivity in response  
574 to diet-induced vitamin D deficiency. A-C, no change in respiratory capacity in  
575 response to the titration of ADP following 1-, 2- and 3-month of vitamin D deficiency  
576 (n = 5-8/group). D, no change in the apparent  $K_m$  for ADP in response to 1-, 2- and  
577 3-month of vitamin D deficiency (n = 5-8/group). Data mean  $\pm$  SD.

578

579 **Figure 5.** Assessment of skeletal muscle mitochondrial protein content following  
580 diet-induced vitamin D deficiency. A-B and D, no changes in expression levels of  
581 mitochondrial complex I (NDUFB8), complex II (SDHB) and complex IV (UQCRC2)  
582 following diet-induced vitamin D deficiency (n=6/group). C and E, lower expression

583 levels of mitochondrial complex III (MTCO1) and complex V (ATP5A) across the  
584 dietary time period with no differences between vitamin D replete and deplete mice  
585 (n = 6/group). Data mean  $\pm$  SD. <sup>b</sup> Main effect for time ( $P < 0.05$ ), <sup>c</sup> Main effect group  
586 x time interaction ( $P < 0.05$ ).

587

588

589

590

591

592

593

594 Figure 1.

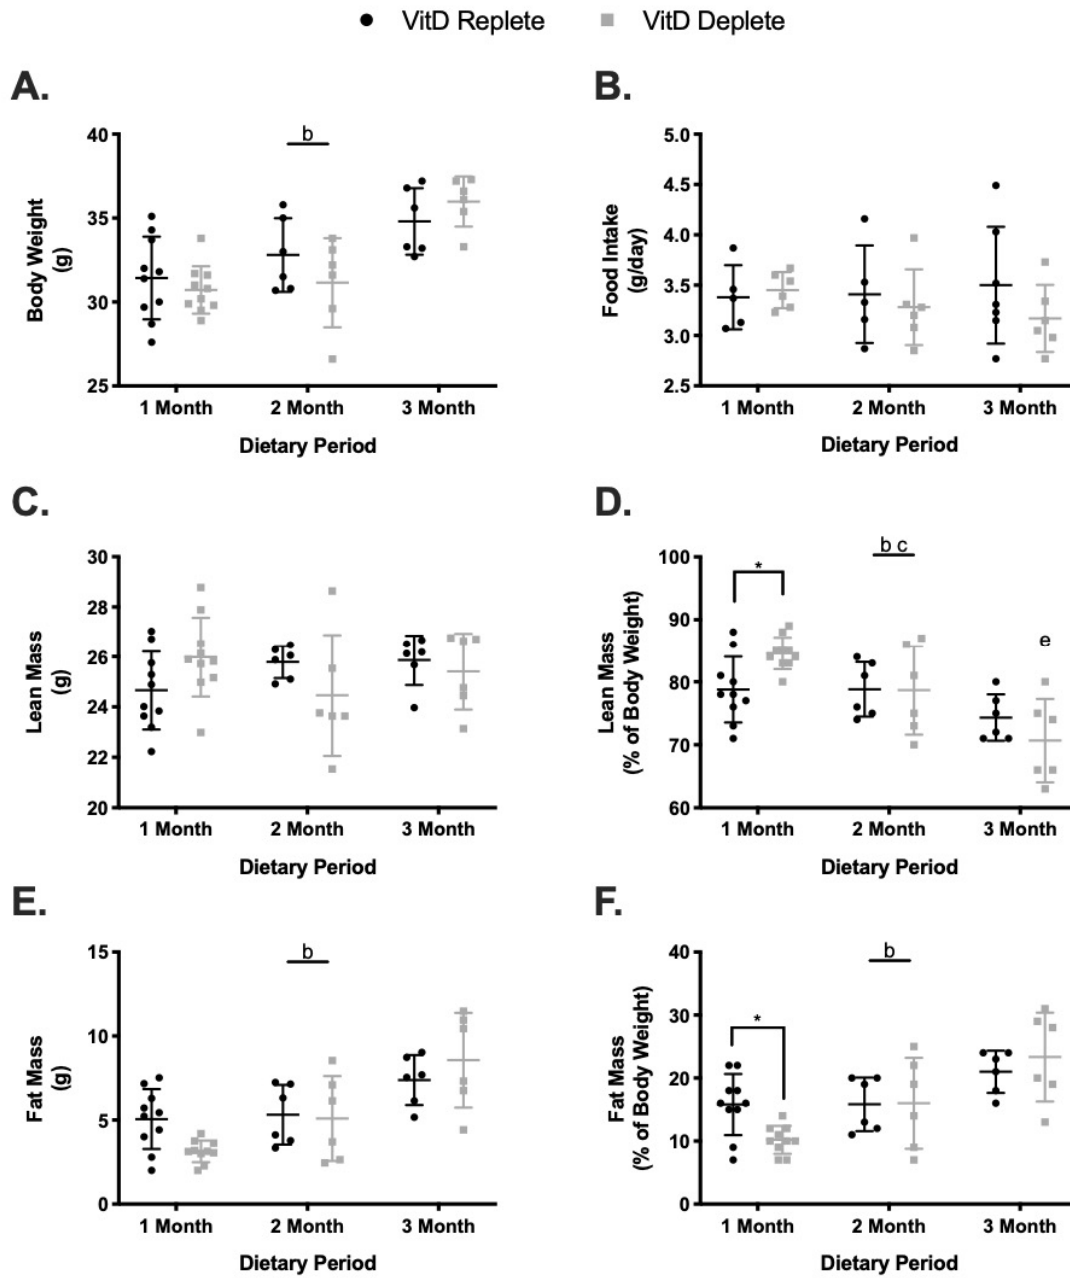

595

596

597

598

599

600 Table 1.

|                      | Dietary Period (Months) |          |          | <i>P</i> | <i>Time</i> |
|----------------------|-------------------------|----------|----------|----------|-------------|
|                      | 1                       | 2        | 3        |          |             |
| <b>Gastrocnemius</b> |                         |          |          |          |             |
| (mg)                 |                         |          |          |          |             |
| Replete              | 143 ± 14                | 166 ± 25 | 161 ± 14 |          |             |
| Deplete              | 152 ± 16                | 149 ± 12 | 156 ± 15 | 0.408    | 0.103       |
| <b>Quadriceps</b>    |                         |          |          |          |             |
| (mg)                 |                         |          |          |          |             |
| Replete              | 160 ± 14                | 189 ± 12 | 182 ± 20 |          |             |
| Deplete              | 169 ± 18                | 178 ± 22 | 184 ± 19 | 0.951    | 0.004       |
| <b>Tricep</b>        |                         |          |          |          |             |
| (mg)                 |                         |          |          |          |             |
| Replete              | 111 ± 20                | 113 ± 14 | 109 ± 10 |          |             |
| Deplete              | 106 ± 9                 | 96 ± 19  | 101 ± 13 | 0.041    | 0.695       |

601

602

603

604

605

606

607

608

609

610

611

612

613

614

615

616



617 Figure 2.

618

619

620

621

622

623

624

625

626

627

628

629

630

631

632

633

634

635

636

637

638

639

640

641

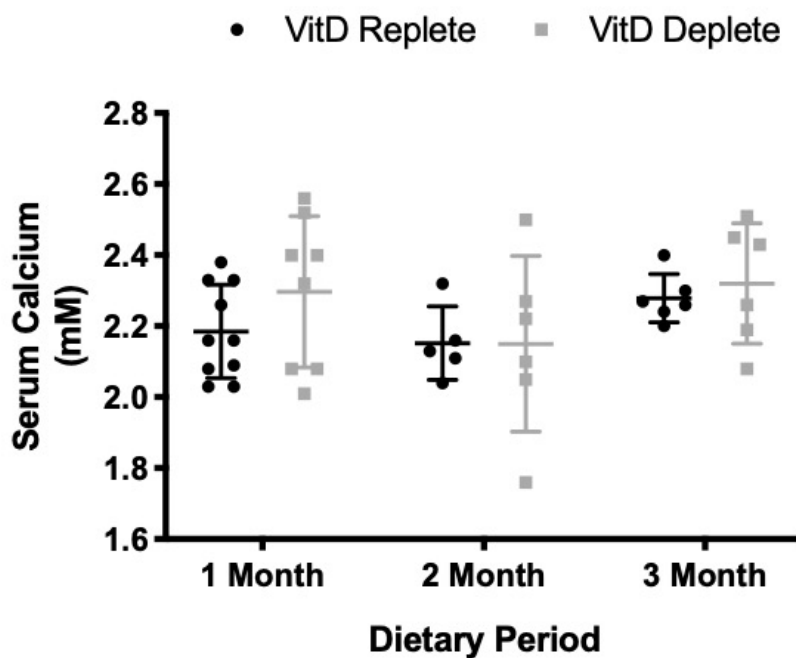

642 Figure 3.

643

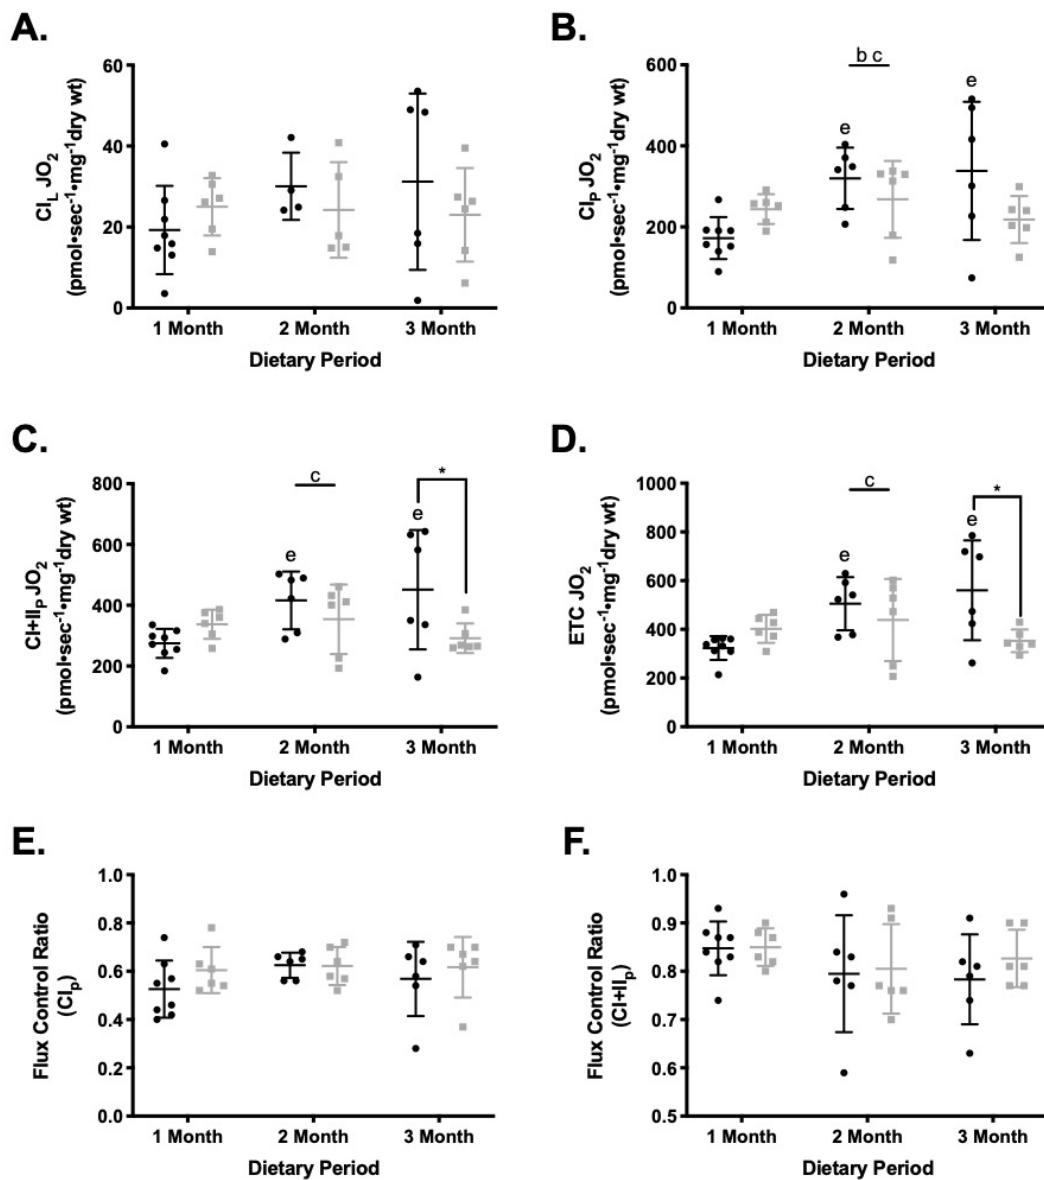

644

645

646

647

648

649

650 Figure 4.

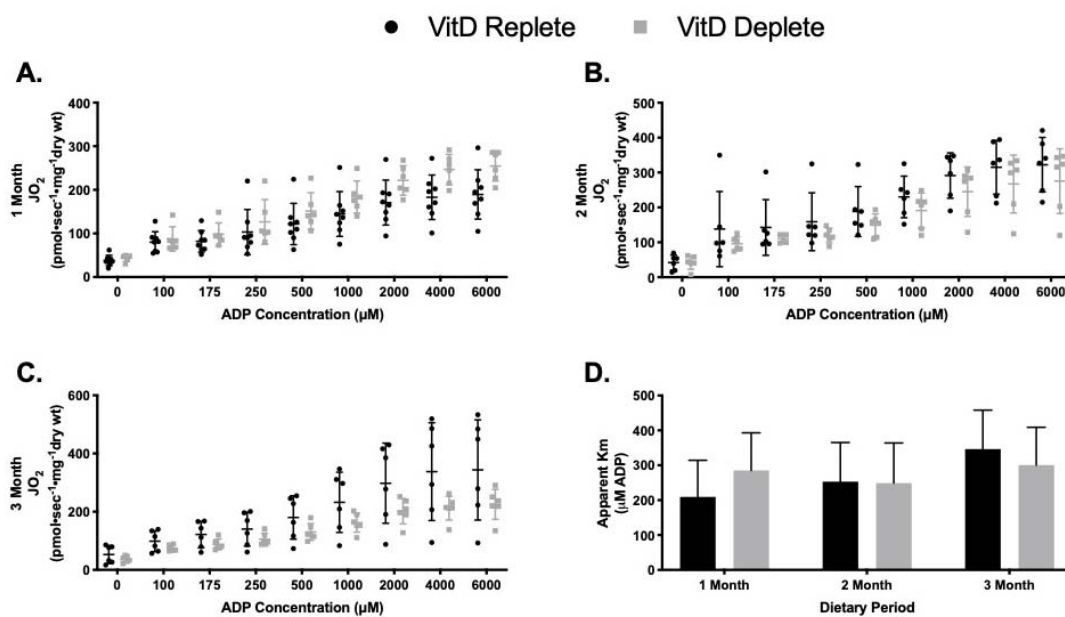

651

652

653

654

655

656

657

658

659

660

661

662

663

664 Figure 5.

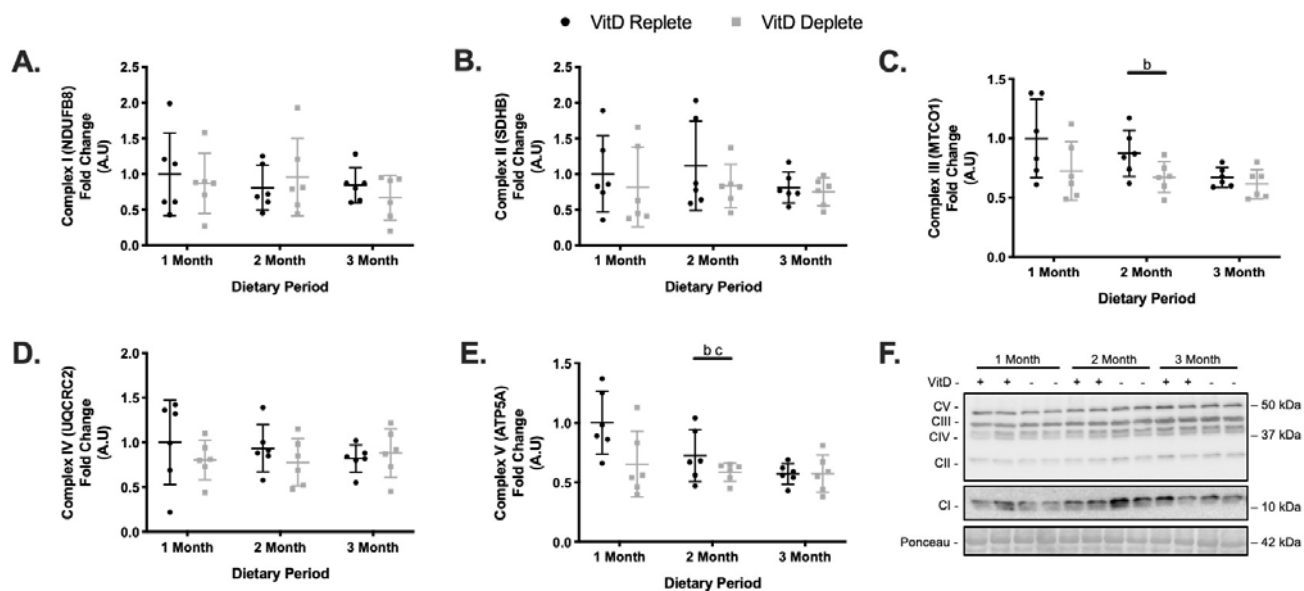

Source: https://www.biorxiv.org/content/10.1101/2020.05.15.098087v1.full.pdf
